# Supplementary material for: The asymmetric expression of HSPA2 in blastomeres governs the first embryonic cell-fate decision
Source: eLife journal article supplement (doi:10.7554/elife.100730), 2024-10-01
Supplement: fig1-data1 [file elife-100730-fig1-data1-v1.zip]

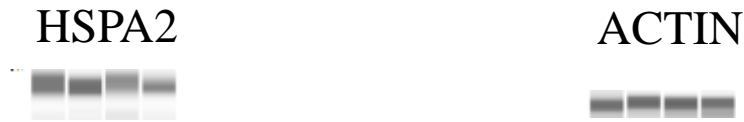

**Figure 1, Source Data 1.** Original membranes corresponding to Figure 1, panel F.

**Figure 1, Hspa2 is asymmetrically expressed between 4-cell blastomeres. F.** 4-cell embryos were separated into individual four blastomeres which were then analyzed by Jess TM Simple Western System based automated western immunoblotting with high sensitivity.

HSPA2

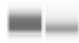

ACTIN

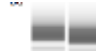

**Figure 1, Source Data 1.** Original membranes corresponding to Figure 1, panel I.

**Figure 1, Hspa2 is asymmetrically expressed between late 2-cell blastomeres. I.** Late 2-cell embryos were separated into individual two blastomeres which were then analyzed by Jess TM Simple Western System based automated western immunoblotting with high sensitivity.
