# Supplementary material for: The asymmetric expression of HSPA2 in blastomeres governs the first embryonic cell-fate decision
Source: eLife journal article supplement (doi:10.7554/elife.100730), 2024-10-01
Supplement: fig1-figsupp1-data1 [file elife-100730-fig1-figsupp1-data1-v1.zip]

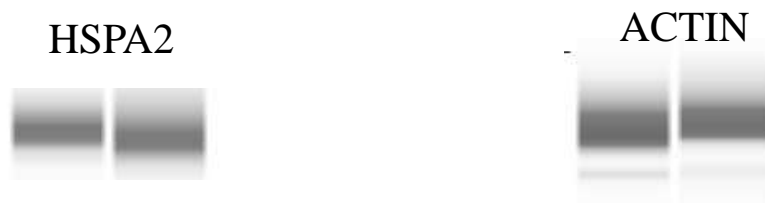

**Figure 1—figure supplement 1—source data 1.** Original membranes corresponding to Figure 1—figure supplement 1, panel D.
