# Supplementary material for: The asymmetric expression of HSPA2 in blastomeres governs the first embryonic cell-fate decision
Source: eLife journal article supplement (doi:10.7554/elife.100730), 2024-10-01
Supplement: fig2-data1 [file elife-100730-fig2-data1-v1.zip]

HSPA2

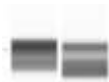

OCT4

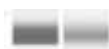

CDX2

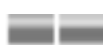

SOX2

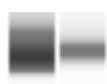

GAPDH

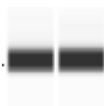

**Figure 2, Source Data 1.** Original membranes corresponding to Figure 2, panel K.

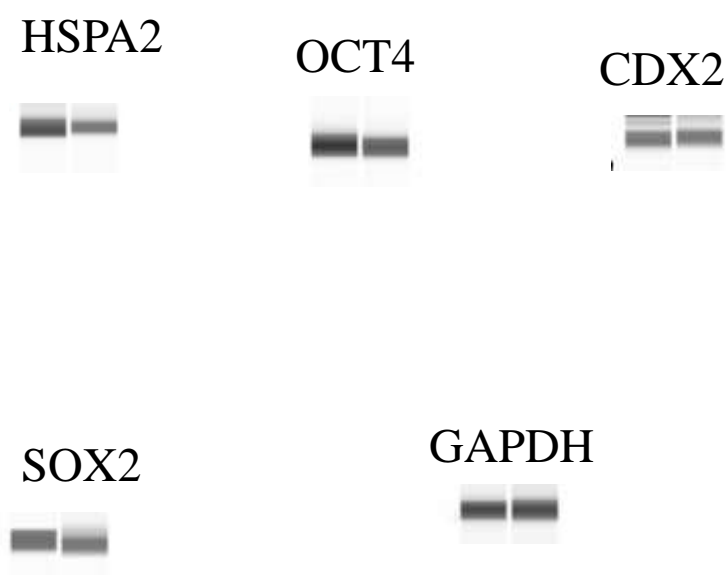

**Figure 2, Source Data 1.** Original membranes corresponding to Figure 2, panel L.

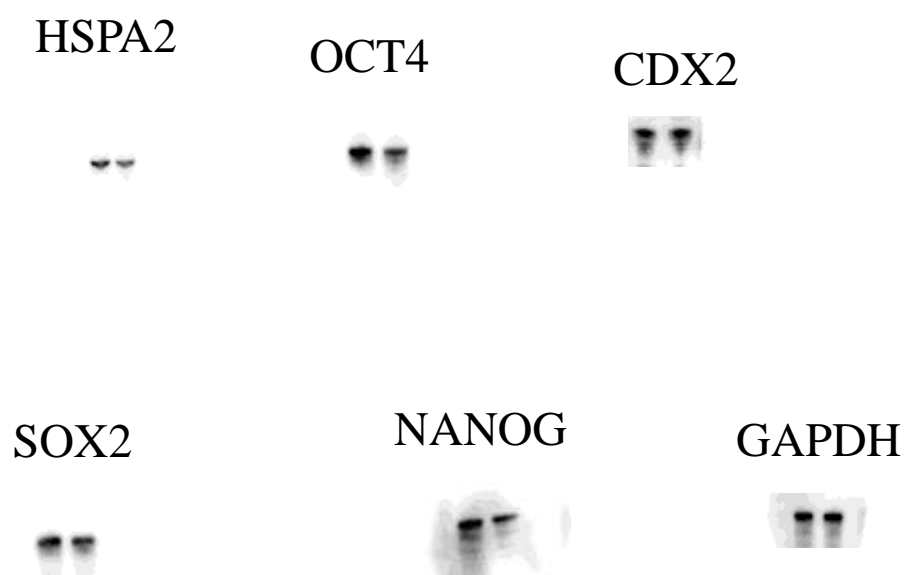

**Figure 2, Source Data 1.** Original membranes corresponding to Figure 2, panel M.
