# Supplementary material for: The asymmetric expression of HSPA2 in blastomeres governs the first embryonic cell-fate decision
Source: eLife journal article supplement (doi:10.7554/elife.100730), 2024-10-01
Supplement: fig4-figsupp1-data1 [file elife-100730-fig4-figsupp1-data1-v1.zip]

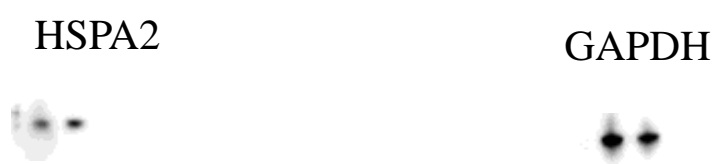

**Figure 4—figure supplement 1—source data 1.** Original membranes corresponding to Figure 4—figure supplement 1, panel A.
