# Supplementary material for: The asymmetric expression of HSPA2 in blastomeres governs the first embryonic cell-fate decision
Source: eLife journal article supplement (doi:10.7554/elife.100730), 2024-10-01
Supplement: fig5-data1 [file elife-100730-fig5-data1-v1.zip]

CARM1

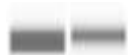

GAPDH

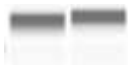

**Figure 5, Source Data 1.** Original membranes corresponding to Figure 5, panel D.

CARM1

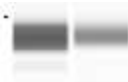

GAPDH

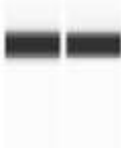

**Figure 5, Source Data 1.** Original membranes corresponding to Figure 5, panel E.

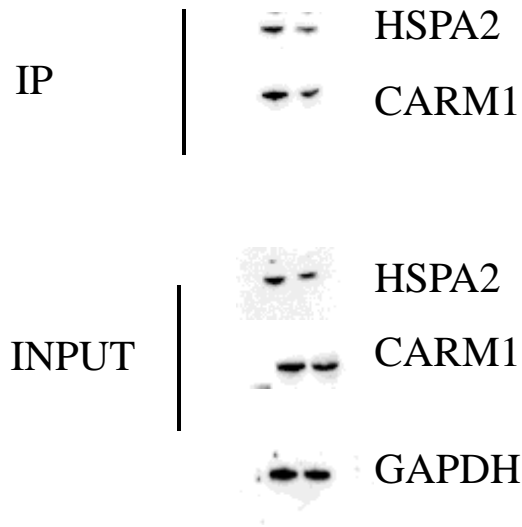

**Figure 5, Source Data 1.** Original membranes corresponding to Figure 5, panel F.

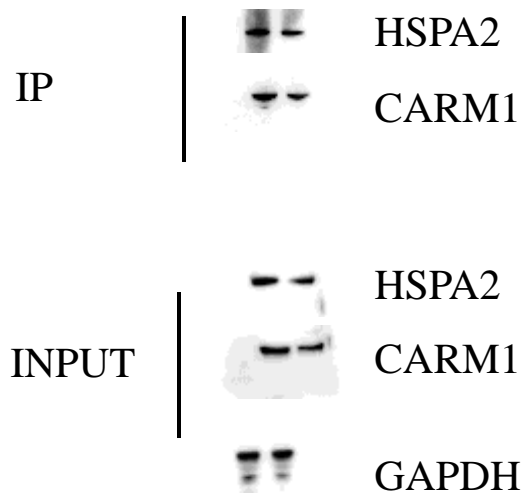

**Figure 5, Source Data 1.** Original membranes corresponding to Figure 5, panel G.
