# Supplementary material for: The asymmetric expression of HSPA2 in blastomeres governs the first embryonic cell-fate decision
Source: eLife journal article supplement (doi:10.7554/elife.100730), 2024-10-01
Supplement: fig5-figsupp1-data1 [file elife-100730-fig5-figsupp1-data1-v1.pdf]

CARM1

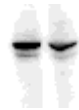

GAPDH

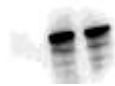

**Figure 5—figure supplement 1—source data 1.** Original membranes corresponding to Figure 5—figure supplement 1, panel G.
